# Supplementary material for: Hypoxia and estrogen are functionally equivalent in breast cancer-endothelial cell interdependence
Source: Springer Nature journal article supplement (doi:10.1186/1476-4598-11-80), 2012-10-22

**A**CoCl<sub>2</sub> (hrs) 0 0 1 1 6 6 16 16 24 24HIF-1 $\alpha$ 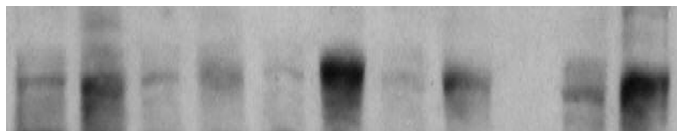

C N C N C N C N L C N

**B**1% O<sub>2</sub> (hrs) 0 1 3 16 24HIF-1 $\alpha$ 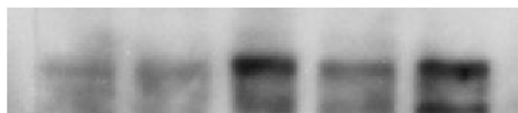

TBP

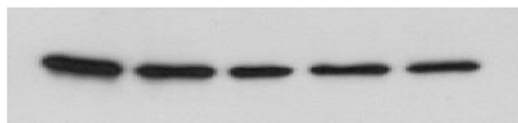**C**

Merge

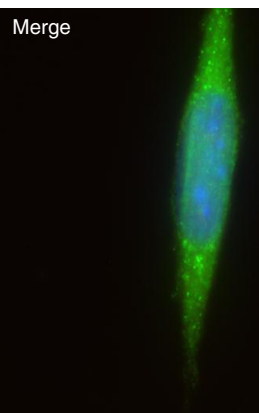HIF-1 $\alpha$ 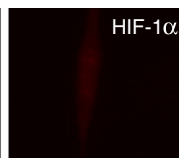

DAPI

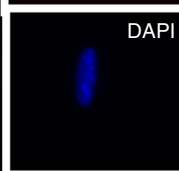

Merge

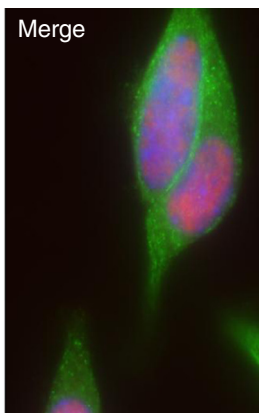HIF-1 $\alpha$ 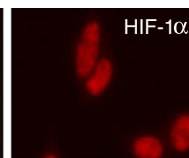

DAPI

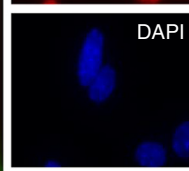

Supplement: 12943_2011_1044_MOESM1_ESM.pdf [file 12943_2011_1044_MOESM1_ESM.pdf]
