# Supplementary material for: Hypoxia and estrogen are functionally equivalent in breast cancer-endothelial cell interdependence
Source: Springer Nature journal article supplement (doi:10.1186/1476-4598-11-80), 2012-10-22

**A**

|                   |   |   |   |   |   |    |    |
|-------------------|---|---|---|---|---|----|----|
| CoCl <sub>2</sub> | - | + | - | + | - | +  | -  |
| E <sub>2</sub>    | - | - | + | - | + | -  | +  |
| (hrs)             | 0 | 3 | 3 | 6 | 6 | 24 | 24 |

HIF-1 $\alpha$ 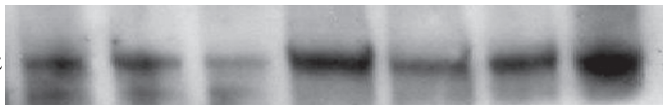

TBP

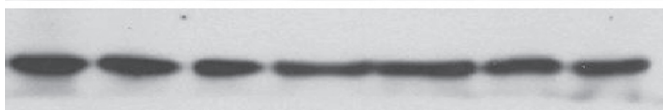**B**

|                |   |   |   |   |
|----------------|---|---|---|---|
| E <sub>2</sub> | - | + | + | + |
| ICI            | - | - | + | - |
| YC1            | - | - | - | + |

HIF-1 $\alpha$ 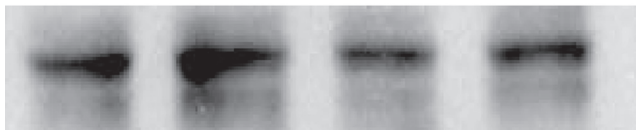

TBP

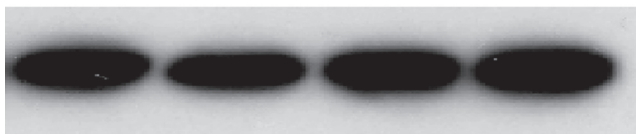

Supplement: 12943_2011_1044_MOESM2_ESM.pdf [file 12943_2011_1044_MOESM2_ESM.pdf]
