# Supplementary material for: Hypoxia and estrogen are functionally equivalent in breast cancer-endothelial cell interdependence
Source: Springer Nature journal article supplement (doi:10.1186/1476-4598-11-80), 2012-10-22

**A**CoCl<sub>2</sub> (hrs)

0

1

6

16

24

VEGF

Actin

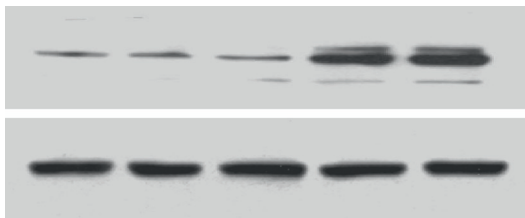**B**E<sub>2</sub>

-

+

+

+

ICI

-

-

+

-

YC1

-

-

-

+

VEGF

Actin

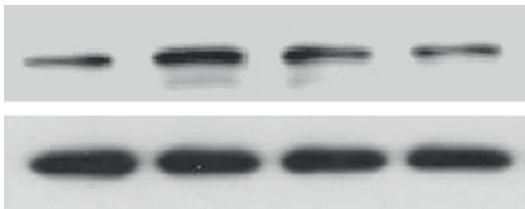**C**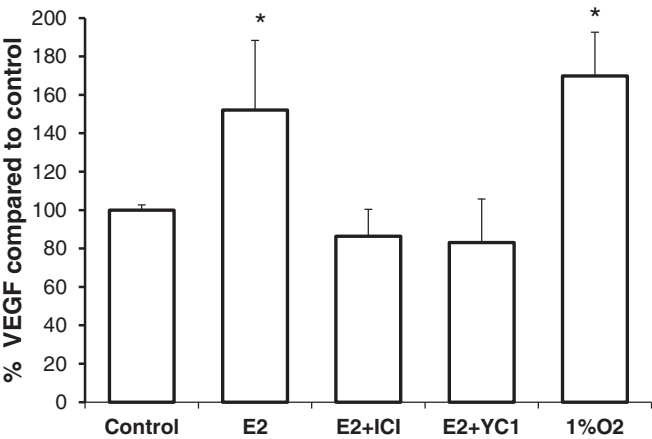

Supplement: 12943_2011_1044_MOESM3_ESM.pdf [file 12943_2011_1044_MOESM3_ESM.pdf]
