# Supplementary material for: Hypoxia and estrogen are functionally equivalent in breast cancer-endothelial cell interdependence
Source: Springer Nature journal article supplement (doi:10.1186/1476-4598-11-80), 2012-10-22

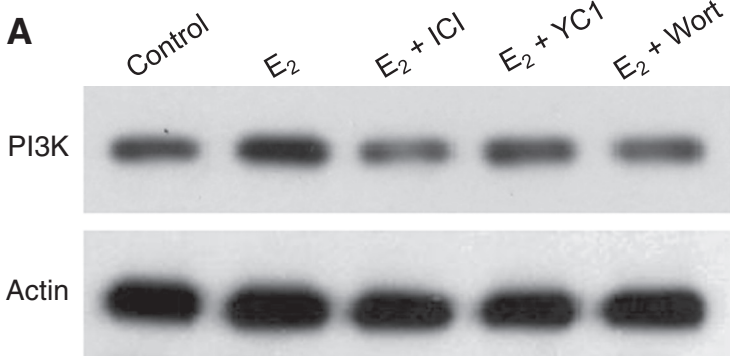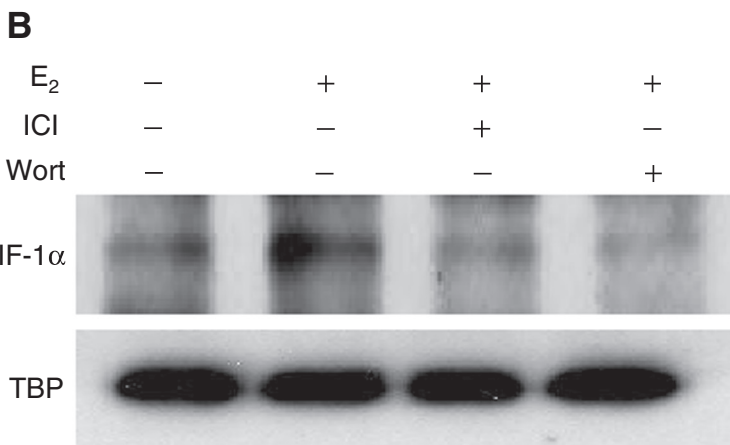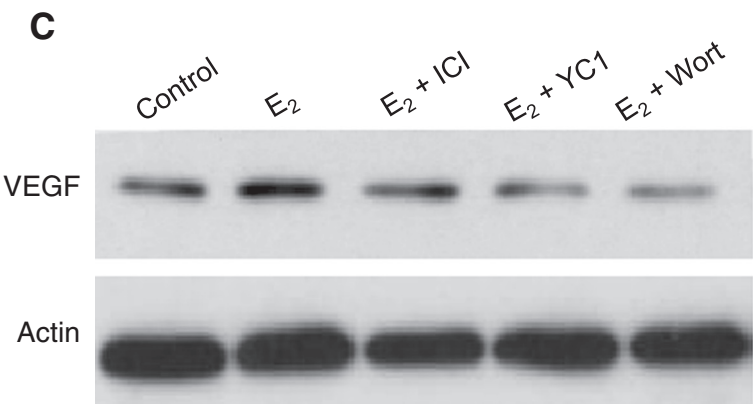

Supplement: 12943_2011_1044_MOESM4_ESM.pdf [file 12943_2011_1044_MOESM4_ESM.pdf]
